# Supplementary material for: An “Escape Clock” for Estimating the Turnover of SIV DNA in Resting CD4+ T Cells
Source: PubMed Central journal article supplement (PMC3320584; doi:10.1371/journal.ppat.1002615), 2012-04-05
Supplement: ppat.1002615.s001.pdf [file ppat.1002615.s001.pdf]

## SUPPLEMENTARY MATERIAL:

### ESTIMATE OF HALF-LIFE OF RESTING INFECTED CD4+ T CELLS WHEN $f_W \neq f_E$

The relationship between the fraction of WT-infected resting cells and viral load may be affected by our assumption that WT- and EM-infected resting cells are created by the virus at the same rate  $f$ . We outline below that, when we allow this rate to differ for WT and EM in our model, it does not change the observed correlation:

In the extended model we assume:

- (i) That the number of new resting cells becoming infected at any time is proportional to the current number of productively infected cells. Generally:

$$\begin{aligned}\frac{dR_W}{dt} &= \mu_W I_W - \frac{\ln 2}{\tau_R} R_W \\ \frac{dR_E}{dt} &= \mu_E I_E - \frac{\ln 2}{\tau_R} R_E\end{aligned}\quad (S1)$$

There is no reason to assume that the constants  $\mu_W$  and  $\mu_E$  are equal.

- (ii) That the number of productively infected cells is proportional to viral load at any time. Again, this is a plausible starting hypothesis, also reproduced in the standard model of viral dynamics. Generally, we have:

$$\begin{aligned}I_W &= \kappa_W W \\ I_E &= \kappa_E E\end{aligned}\quad (S2)$$

In the standard model, the constants  $\kappa_W$  and  $\kappa_E$  would be associated with virus production  $p_W$ ,  $p_E$  and clearance  $c_W$ ,  $c_E$ :

$$\begin{aligned}\kappa_W &\approx c_W / p_W \\ \kappa_E &\approx c_E / p_E\end{aligned}\quad (S3)$$

We combine these two assumptions to express the equations for resting infected cells in terms of viral load instead of productively infected cells:

$$\begin{aligned}\frac{dR_W}{dt} &= \mu_W \kappa_W W - \frac{\ln 2}{\tau_R} R_W \\ \frac{dR_E}{dt} &= \mu_E \kappa_E E - \frac{\ln 2}{\tau_R} R_E\end{aligned}\quad (S4)$$

and we call the combined constants:

$$\begin{aligned}f_W &= \mu_W \kappa_W \\ f_E &= \mu_E \kappa_E\end{aligned}\quad (S5)$$

In standard model, we would have:

$$\begin{aligned}f_W &\approx \mu_W c_W / p_W \\ f_E &\approx \mu_E c_E / p_E\end{aligned}\quad (S6)$$

Now, escape mutations usually carry a fitness cost that reduces their replicative capacity. Assuming that we can describe the process in terms of the standard model, this would mean that the product of infectivity and viral production is lower in the escape mutant.

However, because of the immune pressure on the wild-type virus, escape mutant ultimately prevails. This can be achieved in several ways depending on the effect of the escape mutation and the type of immune response. Each possibility has a different impact on the relationship between the constants  $\kappa_W$  and  $\kappa_E$ . In particular:

- (i) If the immune response is cytolytic, then the lifespan of WT-infected productive cells is reduced, and the replicative capacity of EM stays lower than the replicative capacity of WT. In this case,
  - (a) if replicative capacity of EM is lower because its infectivity is lower, but production rate is not, then  $\kappa_W \approx \kappa_E$ ;
  - (b) if fitness cost reduces EM production rate, then  $\kappa_W < \kappa_E$ .
- (ii) If the main type of immune response is noncytolytic, it may suppress infectivity or production rate of WT, so that its replicative capacity falls below EM.
  - (a) If immune response reduces infectivity of WT and fitness cost reduces infectivity of EM, then  $\kappa_W \approx \kappa_E$ ;
  - (b) If immune response reduces infectivity of WT and fitness cost reduces production rate of EM, then  $\kappa_W < \kappa_E$ ;
  - (c) If immune response reduces production of WT and fitness cost reduces infectivity of EM, then  $\kappa_W > \kappa_E$ ;
  - (d) If immune response reduces production of WT and fitness cost reduces production of EM, then  $\kappa_W > \kappa_E$  because there is escape.

In addition, the propensity of each strain to create infected resting cells can in principle differ in any direction:  $\mu_W < \mu_E$ ,  $\mu_W \approx \mu_E$  OR  $\mu_W > \mu_E$ .

Even with a simple interpretation of the standard model, it is evident that the presence of fitness cost and noncytolytic immune response does not indicate any specific relationship between  $f_W$  and  $f_E$ . For a rough estimate of resting cell lifespan we initially used the simplest assumption – that they were equal:  $f_W = f_E = f$ , in the spirit of Occam's razor.

However, the difference between WT content in plasma and in resting cells may be the result of a difference between  $f_W$  and  $f_E$ . We therefore investigated the possible effect of this difference and show below that our estimates of the range of half-lives and our finding of the negative correlation between chronic viral load and half-life of resting infected cells are not affected by a difference between  $f_W$  and  $f_E$ .

If  $f_E/f_W = a$ , then Eq.(1) in the manuscript would change to:

$$\begin{aligned} \frac{dR_W}{dt} &= f_W W - \frac{\ln 2}{\tau_R} R_W \\ \frac{dR_E}{dt} &= a f_W E - \frac{\ln 2}{\tau_R} R_E \end{aligned} \tag{S7}$$

The formal effect is to scale EM viral load by  $a$ . This would again lead to cancellation of  $f_W$  in the equations for fitting of  $\tau_R$  from the fraction of WT in resting cells:

$$\begin{aligned} \frac{d\Lambda}{dt} &= W + aE - \frac{\ln 2}{\tau_R} \Lambda \\ \frac{db_W}{dt} &= \frac{W}{\Lambda} - \frac{W + aE}{\Lambda} b_W \end{aligned} \quad (S8)$$

In this case we have 2 parameters:  $\tau_R$  and  $a$ , and the estimate of  $\tau_R$  would depend on the choice of  $a$ .

In Table S1 we show the best-fit values for 1 and 2 parameter fits.

| Animal | $\tau_R$<br>(1-parameter fit) | $a = f_E/f_W$<br>(2-parameter fit) | $\tau_R$<br>(2-parameter fit) |
|--------|-------------------------------|------------------------------------|-------------------------------|
| 19351  | <0.5                          | 12.589                             | <0.5                          |
| C0933  | <0.5                          | 7.9433                             | <0.5                          |
| 25377  | <0.5                          | 1.0000                             | <0.5                          |
| 2374   | <0.5                          | 1.2589                             | <0.5                          |
| C3751  | 1.3808                        | 1.0000                             | 1.3919                        |
| 19341  | 1.7957                        | 1.5849                             | 3.5007                        |
| B0526  | 2.7289                        | 0.12589                            | <0.5                          |
| C5873  | 2.3105                        | 0.50119                            | 1.8633                        |
| B0508  | 8.1547                        | 0.39811                            | 6.9315                        |
| 8014   | 14.623                        | 0.15849                            | 10.502                        |
| 1.3731 | 15.861                        | 0.19953                            | 12.378                        |
| 1335   | 21.068                        | 0.0100000                          | 5.7762                        |
| 9183   | 32.390                        | 0.39811                            | 24.755                        |
| 8244   | 30.401                        | 0.19953                            | 19.254                        |
| 8020   | >10 <sup>5</sup>              | 1.0000                             | >10 <sup>5</sup>              |
| 5424   | >10 <sup>5</sup>              | 0.12589                            | 346.57                        |
| 9175   | >10 <sup>5</sup>              | 0.0100000                          | >10 <sup>5</sup>              |
| 9021   | >10 <sup>5</sup>              | 0.0079433                          | >10 <sup>5</sup>              |

Table S1.

In Fig.S1 we show the estimates of half-life when fitting just  $\tau_R$  and when fitting  $\tau_R$  and  $a$  simultaneously. There is no significant difference in the medians of the estimated half-lives (although a paired test reveals a significant trend of shorter estimates when we fit both parameters), although the additional parameter improves the fit. In Fig.S2 we show the correlation between half-life and chronic viral load (a) with one-parameter fit and (b) with a two-parameter fit. The same negative correlation holds in both cases with the same degree of significance.

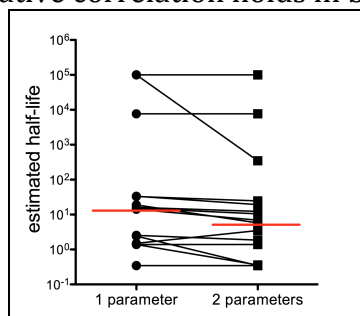

Fig.S1: Half-lives of resting infected cells estimated from one-parameter (Eq.S8, assuming  $a=1$ ) and two-parameter (Eq.S8) model. Medians are shown in red.

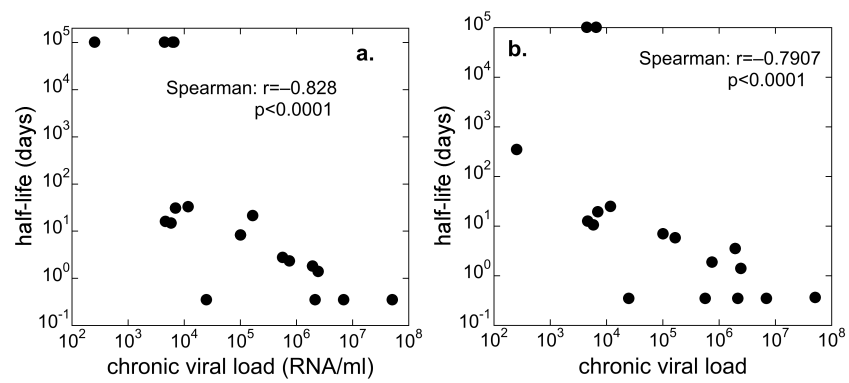

Fig.S2: Correlation between chronic viral load and estimated half-life of resting infected cells; a. fit of just  $\tau_R$  (Eq.S8, assuming  $\alpha=1$ ); b. simultaneous fit of  $\tau_R$  and  $\alpha$  (Eq.S8).
